# Supplementary material for: Detecting sequence signals in targeting peptides using deep learning
Source: Life Sci Alliance. 2019 Sep 30;2(5):e201900429. doi: 10.26508/lsa.201900429 (PMC6769257; doi:10.26508/lsa.201900429)
Supplement: Supplementary file 1 [file LSA-2019-00429_TableS1.docx]

Table S1: F1 score for the MLP predictor, using different number of N-terminal residues.

| |  | Tool | SP | mTP | cTP | luTP | noTP | Average | | --- | --- | --- | --- | --- | --- | --- | --- | |  | MLP-5 | 0.57 | 0.22 | 0.03 | 0.00 | 0.88 | 0.77 | |  | MLP-10 | 0.80 | 0.55 | 0.33 | 0.04 | 0.93 | 0.87 | |  | MLP-15 | 0.90 | 0.57 | 0.42 | 0.00 | 0.95 | 0.91 | |  | MLP-20 | 0.93 | 0.63 | 0.43 | 0.04 | 0.96 | 0.93 | |
| --- | --- | --- | --- | --- | --- | --- | --- | --- | --- | --- | --- | --- | --- | --- | --- | --- | --- | --- | --- | --- | --- | --- | --- | --- | --- | --- | --- | --- | --- | --- | --- | --- | --- | --- | --- | --- | --- | --- | --- | --- |
