# Supplementary material for: Detecting sequence signals in targeting peptides using deep learning
Source: Life Sci Alliance. 2019 Sep 30;2(5):e201900429. doi: 10.26508/lsa.201900429 (PMC6769257; doi:10.26508/lsa.201900429)
Supplement: Supplementary file 2 [file LSA-2019-00429_TableS2.docx]

Table S2: Confusion matrix for non-plant organisms representing the number of proteins for each targeting peptides predicted by TargetP 2.0 (rows) versus observed in the test set (columns).

| |  | Class | SP | mTP | noTP | | --- | --- | --- | --- | --- | |  | SP | 2390 | 5 | 47 | |  | mTP | 2 | 311 | 44 | |  | noTP | 23 | 58 | 7644 | |
| --- | --- | --- | --- | --- | --- | --- | --- | --- | --- | --- | --- | --- | --- | --- | --- | --- | --- | --- | --- | --- |
