# Supplementary material for: Detecting sequence signals in targeting peptides using deep learning
Source: Life Sci Alliance. 2019 Sep 30;2(5):e201900429. doi: 10.26508/lsa.201900429 (PMC6769257; doi:10.26508/lsa.201900429)
Supplement: Supplementary file 3 [file LSA-2019-00429_TableS3.docx]

Table S3: Confusion matrix for Viridiplantae representing the number of proteins for each targeting peptides predicted by TargetP 2.0 (rows) versus observed in the test set (columns).

| |  | Class | SP | mTP | cTP | luTP | noTP | | --- | --- | --- | --- | --- | --- | --- | |  | SP | 272 | 0 | 2 | 0 | 3 | |  | mTP | 0 | 117 | 2 | 0 | 11 | |  | cTP | 0 | 2 | 197 | 9 | 9 | |  | luTP | 0 | 0 | 11 | 34 | 0 | |  | noTP | 10 | 6 | 15 | 2 | 1779 | |
| --- | --- | --- | --- | --- | --- | --- | --- | --- | --- | --- | --- | --- | --- | --- | --- | --- | --- | --- | --- | --- | --- | --- | --- | --- | --- | --- | --- | --- | --- | --- | --- | --- | --- | --- | --- | --- | --- | --- | --- | --- | --- | --- |
