# Supplementary material for: Detecting sequence signals in targeting peptides using deep learning
Source: Life Sci Alliance. 2019 Sep 30;2(5):e201900429. doi: 10.26508/lsa.201900429 (PMC6769257; doi:10.26508/lsa.201900429)
Supplement: Supplementary file 4 [file LSA-2019-00429_TableS4.docx]

Table S4: Performance of TargetP 2.0 considering only the peptide prediction in one kingdom at a time. This table shows the performance in the test set yield by each predictor for Mitochondria (mTP), Chloroplast (cTP) , Thylakoid (luTP), Signal Peptide (SP), and the other proteins without targeting peptide (noTP), in terms of F1 score, Matthews correlation coefficient (MCC), Precision and Recall

| |  | Kingdom | Loc | Proteins | Precision | Recall | F1-Score | MCC | | --- | --- | --- | --- | --- | --- | --- | --- | |  | Viridiplantae | SP | 282 | 0.98 | 0.96 | 0.97 | 0.97 | |  | Metazoa | SP | 2251 | 0.98 | 0.99 | 0.99 | 0.98 | |  | Fungi | SP | 133 | 0.91 | 0.99 | 0.95 | 0.95 | |  | Other | SP | 31 | 1.0 | 0.97 | 0.98 | 0.98 | |  | Viridiplantae | mTP | 125 | 0.9 | 0.94 | 0.92 | 0.91 | |  | Metazoa | mTP | 263 | 0.89 | 0.86 | 0.87 | 0.87 | |  | Fungi | mTP | 103 | 0.83 | 0.77 | 0.80 | 0.79 | |  | Other | mTP | 8 | 0.88 | 0.88 | 0.88 | 0.87 | |  | Viridiplantae | cTP | 227 | 0.91 | 0.87 | 0.89 | 0.88 | |  | Viridiplantae | luTP | 45 | 0.76 | 0.76 | 0.76 | 0.75 | |  | Viridiplantae | noTP | 1802 | 0.98 | 0.99 | 0.98 | 0.94 | |  | Metazoa | noTP | 5354 | 0.99 | 0.99 | 0.99 | 0.97 | |  | Fungi | noTP | 2263 | 0.99 | 0.99 | 0.99 | 0.88 | |  | Other | noTP | 118 | 0.98 | 0.99 | 0.99 | 0.95 | |
| --- | --- | --- | --- | --- | --- | --- | --- | --- | --- | --- | --- | --- | --- | --- | --- | --- | --- | --- | --- | --- | --- | --- | --- | --- | --- | --- | --- | --- | --- | --- | --- | --- | --- | --- | --- | --- | --- | --- | --- | --- | --- | --- | --- | --- | --- | --- | --- | --- | --- | --- | --- | --- | --- | --- | --- | --- | --- | --- | --- | --- | --- | --- | --- | --- | --- | --- | --- | --- | --- | --- | --- | --- | --- | --- | --- | --- | --- | --- | --- | --- | --- | --- | --- | --- | --- | --- | --- | --- | --- | --- | --- | --- | --- | --- | --- | --- | --- | --- | --- | --- | --- | --- | --- | --- | --- | --- | --- | --- | --- | --- | --- | --- | --- | --- | --- | --- | --- | --- | --- | --- |
