# Supplementary material for: Detecting sequence signals in targeting peptides using deep learning
Source: Life Sci Alliance. 2019 Sep 30;2(5):e201900429. doi: 10.26508/lsa.201900429 (PMC6769257; doi:10.26508/lsa.201900429)
Supplement: Supplementary file 5 [file LSA-2019-00429_TableS5.docx]

Table S5: Performance for the cleavage site predictions. This table shows the Recall (accuracy) in the test set yield by each predictor for Mitochondria (mTP), Chloroplast (cTP) , Thylakoid (luTP) and Signal Peptide(SP). The column Recall -5/+5 shows the performance when a positional shift of up to five residues is allowed.

| |  | Tool | Loc | Recall | No. Correct | No. Correct -5/+5 | Recall -5/+5 | Total No. |  |  | | --- | --- | --- | --- | --- | --- | --- | --- | --- | --- | |  | TargetP 2.0 | SP | 0.83 | 2248 | 2584 | 0.96 | 2697 |  |  | |  | TargetP 1.1 | SP | 0.83 | 2250 | 2551 | 0.95 | 2697 |  |  | |  | PredSL | SP | 0.70 | 1889 | 2312 | 0.86 | 2697 |  |  | |  | SignalP 5.0 | SP | 0.86 | 2313 | 2592 | 0.96 | 2697 |  |  | |  | TargetP 2.0 | mTP | 0.46 | 230 | 326 | 0.65 | 499 |  |  | |  | TargetP 1.1 | mTP | 0.42 | 211 | 276 | 0.55 | 499 |  |  | |  | PredSL | mTP | 0.16 | 81 | 196 | 0.39 | 499 |  |  | |  | TPpred 3 | mTP | 0.39 | 195 | 259 | 0.52 | 499 |  |  | |  | Mitofates | mTP | 0.18 | 88 | 251 | 0.50 | 499 |  |  | |  | TargetP 2.0 | cTP | 0.49 | 111 | 164 | 0.72 | 227 |  |  | |  | TargetP 1.1 | cTP | 0.07 | 17 | 104 | 0.46 | 227 |  |  | |  | PredSL | cTP | 0.11 | 25 | 67 | 0.30 | 227 |  |  | |  | TPpred 3 | cTP | 0.30 | 67 | 105 | 0.46 | 227 |  |  | |  | TargetP 2.0 | luTP | 0.60 | 27 | 31 | 0.69 | 45 |  |  | |  | PredSL | luTP | 0.10 | 5 | 32 | 0.71 | 45 |  |  | |
| --- | --- | --- | --- | --- | --- | --- | --- | --- | --- | --- | --- | --- | --- | --- | --- | --- | --- | --- | --- | --- | --- | --- | --- | --- | --- | --- | --- | --- | --- | --- | --- | --- | --- | --- | --- | --- | --- | --- | --- | --- | --- | --- | --- | --- | --- | --- | --- | --- | --- | --- | --- | --- | --- | --- | --- | --- | --- | --- | --- | --- | --- | --- | --- | --- | --- | --- | --- | --- | --- | --- | --- | --- | --- | --- | --- | --- | --- | --- | --- | --- | --- | --- | --- | --- | --- | --- | --- | --- | --- | --- | --- | --- | --- | --- | --- | --- | --- | --- | --- | --- | --- | --- | --- | --- | --- | --- | --- | --- | --- | --- | --- | --- | --- | --- | --- | --- | --- | --- | --- | --- | --- | --- | --- | --- | --- | --- | --- | --- | --- | --- | --- | --- | --- | --- | --- | --- | --- | --- | --- | --- | --- | --- | --- | --- | --- | --- | --- | --- | --- | --- | --- | --- | --- | --- | --- | --- | --- | --- | --- | --- |
