# Supplementary material for: Detecting sequence signals in targeting peptides using deep learning
Source: Life Sci Alliance. 2019 Sep 30;2(5):e201900429. doi: 10.26508/lsa.201900429 (PMC6769257; doi:10.26508/lsa.201900429)
Supplement: Supplementary file 6 [file LSA-2019-00429_TableS6.docx]

Table S6: Corrected number of proteins annotated with different targeting peptides for the A. thaliana genome using the confusion matrix from Table [S3](supplementary/index.html#table:cm_plant).

| |  | Class | Original | Corrected | Shift | | --- | --- | --- | --- | --- | |  | SP | 4115 | 4109.3 | -0.1% | |  | mTP | 1095 | 1106.5 | +1.1% | |  | cTP | 1448 | 1410.6 | -2.6% | |  | luTP | 127 | 158.6 | +24.9% | |
| --- | --- | --- | --- | --- | --- | --- | --- | --- | --- | --- | --- | --- | --- | --- | --- | --- | --- | --- | --- | --- | --- | --- | --- | --- | --- |
