# Supplementary material for: Detecting sequence signals in targeting peptides using deep learning
Source: Life Sci Alliance. 2019 Sep 30;2(5):e201900429. doi: 10.26508/lsa.201900429 (PMC6769257; doi:10.26508/lsa.201900429)
Supplement: Supplementary file 7 [file LSA-2019-00429_TableS7.docx]

Table S7: The table shows the the agreement with Uniprot annotations. The column fractions contain the number of TargetP 2.0 predictions that agree with the UniProt annotations.

| | Kingdom | Organism | Reference | TargetP 2.0 | Uniprot | Agree | Fractions | | --- | --- | --- | --- | --- | --- | --- | | SP | | | | | | | | Metazoa | H. sapiens | 20585 | 3698 | 3521 | 3382 | 91.5% | | Metazoa | D. melanogaster | 13785 | 3323 | 3076 | 2994 | 90.1% | | Metazoa | M. musculus | 22286 | 4278 | 4042 | 3883 | 90.8% | | Metazoa | C. elegans | 19986 | 4591 | 4078 | 3967 | 86.4% | | Metazoa | X. tropicalis | 24138 | 2366 | 1933 | 1841 | 77.8% | | Metazoa | D. rerio | 25747 | 4399 | 3808 | 3651 | 82.9% | | Fungi | S. cerevisiae | 6049 | 386 | 298 | 272 | 70.5% | | Fungi | S. pombe | 5142 | 252 | 214 | 195 | 77.4% | | Viridiplantae | A. thaliana | 27623 | 4115 | 3543 | 3374 | 82.0% | | Viridiplantae | B. distachyon | 34230 | 3987 | 3567 | 3216 | 80.7% | | Viridiplantae | O. sativa | 43588 | 4687 | 4169 | 3644 | 77.7% | | Viridiplantae | S. lycopersicum | 33952 | 3904 | 2848 | 2675 | 68.5% | | Viridiplantae | V. vinifera | 29882 | 2980 | 2199 | 2019 | 67.8% | | mTP | | | | | | | | Metazoa | H. sapiens | 20585 | 627 | 540 | 442 | 70.5% | | Metazoa | D. melanogaster | 13785 | 522 | 136 | 102 | 19.5% | | Metazoa | M. musculus | 22286 | 631 | 519 | 429 | 68.0% | | Metazoa | C. elegans | 19986 | 447 | 116 | 88 | 19.7% | | Metazoa | X. tropicalis | 24138 | 453 | 51 | 37 | 8.2% | | Metazoa | D. rerio | 25747 | 626 | 98 | 70 | 11.2% | | Fungi | S. cerevisiae | 6049 | 368 | 365 | 284 | 77.2% | | Fungi | S. pombe | 5142 | 250 | 266 | 159 | 63.6% | | Viridiplantae | A. thaliana | 27623 | 1095 | 526 | 432 | 39.5% | | Viridiplantae | B. distachyon | 34230 | 970 | 0 | 0 | 0.0% | | Viridiplantae | O. sativa | 43588 | 1100 | 86 | 67 | 6.1% | | Viridiplantae | S. lycopersicum | 33952 | 931 | 4 | 4 | 0.4% | | Viridiplantae | V. vinifera | 29882 | 725 | 0 | 0 | 0.0% | | cTP | | | | | | | | Viridiplantae | A. thaliana | 27623 | 1448 | 1222 | 884 | 61.0% | | Viridiplantae | B. distachyon | 34230 | 1781 | 0 | 0 | 0.0% | | Viridiplantae | O. sativa | 43588 | 2049 | 340 | 279 | 13.6% | | Viridiplantae | S. lycopersicum | 33952 | 1274 | 78 | 57 | 4.5% | | Viridiplantae | V. vinifera | 29882 | 1125 | 3 | 2 | 0.2% | | luTP | | | | | | | | Viridiplantae | A. thaliana | 27623 | 127 | 72 | 58 | 45.7% | | Viridiplantae | B. distachyon | 34230 | 85 | 0 | 0 | 0.0% | | Viridiplantae | O. sativa | 43588 | 84 | 9 | 5 | 6.0% | | Viridiplantae | S. lycopersicum | 33952 | 117 | 1 | 1 | 0.9% | | Viridiplantae | V. vinifera | 29882 | 91 | 0 | 0 | 0.0% | |
| --- | --- | --- | --- | --- | --- | --- | --- | --- | --- | --- | --- | --- | --- | --- | --- | --- | --- | --- | --- | --- | --- | --- | --- | --- | --- | --- | --- | --- | --- | --- | --- | --- | --- | --- | --- | --- | --- | --- | --- | --- | --- | --- | --- | --- | --- | --- | --- | --- | --- | --- | --- | --- | --- | --- | --- | --- | --- | --- | --- | --- | --- | --- | --- | --- | --- | --- | --- | --- | --- | --- | --- | --- | --- | --- | --- | --- | --- | --- | --- | --- | --- | --- | --- | --- | --- | --- | --- | --- | --- | --- | --- | --- | --- | --- | --- | --- | --- | --- | --- | --- | --- | --- | --- | --- | --- | --- | --- | --- | --- | --- | --- | --- | --- | --- | --- | --- | --- | --- | --- | --- | --- | --- | --- | --- | --- | --- | --- | --- | --- | --- | --- | --- | --- | --- | --- | --- | --- | --- | --- | --- | --- | --- | --- | --- | --- | --- | --- | --- | --- | --- | --- | --- | --- | --- | --- | --- | --- | --- | --- | --- | --- | --- | --- | --- | --- | --- | --- | --- | --- | --- | --- | --- | --- | --- | --- | --- | --- | --- | --- | --- | --- | --- | --- | --- | --- | --- | --- | --- | --- | --- | --- | --- | --- | --- | --- | --- | --- | --- | --- | --- | --- | --- | --- | --- | --- | --- | --- | --- | --- | --- | --- | --- | --- | --- | --- | --- | --- | --- | --- | --- | --- | --- | --- | --- | --- | --- | --- | --- | --- | --- | --- | --- | --- | --- | --- | --- | --- | --- | --- | --- | --- | --- | --- | --- | --- | --- | --- | --- | --- | --- | --- | --- | --- | --- | --- | --- | --- | --- | --- | --- | --- | --- | --- | --- | --- | --- | --- | --- | --- | --- | --- | --- | --- | --- | --- | --- | --- | --- | --- | --- | --- | --- | --- | --- | --- | --- | --- |
