# Supplementary material for: Detecting sequence signals in targeting peptides using deep learning
Source: Life Sci Alliance. 2019 Sep 30;2(5):e201900429. doi: 10.26508/lsa.201900429 (PMC6769257; doi:10.26508/lsa.201900429)
Supplement: Supplementary file 9 [file LSA-2019-00429_TableS9.docx]

Table S9: Amino acid frequencies in position two in A. thaliana for proteins predicted to belong to different classes by TargetP 2.0. All frequencies higher than 10% are marked in bold.

| |  | AA | noTP | SP | mTP | cTP | luTP | | --- | --- | --- | --- | --- | --- | --- | |  | A | **16.4%** | **25.7%** | **27.4%** | **48.3%** | **32.1%** | |  | C | 1.0% | 0.7% | 0.4% | 0.7% | 3.6% | |  | D | 8.1% | 3.8% | 0.0% | 1.0% | 3.6% | |  | E | **13.0%** | 8.5% | 0.8% | 5.0% | **10.7%** | |  | F | 2.1% | 2.6% | 6.6% | 0.7% | 3.6% | |  | G | **11.0%** | 7.6% | 1.9% | 2.0% | 0.0 % | |  | H | 0.9% | 0.7% | 0.8% | % | 3.6% | |  | I | 2.6% | 2.7% | 3.1% | 2.7% | 3.6% | |  | K | 5.2% | **11.1%** | 3.5% | 1.3% | 3.6% | |  | L | 3.5% | 2.9% | **11.6%** | 6.0% | 3.6% | |  | M | 2.4% | 2.5% | 3.5% | 2.0% | 3.6% | |  | N | 3.5% | 3.4% | 3.5% | 1.3% | 3.6% | |  | P | 2.6% | 1.0% | 0.4% | 1.3% | 3.6% | |  | Q | 1.8% | 1.1% | 3.1% | 1.7% | 3.6% | |  | R | 2.9% | 2.9% | 7.7% | 0.3% | 0.0 % | |  | S | **10.1%** | 9.3% | **15.4%** | **14.8%** | 3.6% | |  | T | 4.4% | 5.8% | 2.7% | 4.0% | 3.6% | |  | V | 6.2% | 6.2% | 2.3% | 4.4% | 7.1% | |  | W | 0.8% | 0.5% | 1.9% | 1.0% | 0.0 % | |  | Y | 1.4% | 0.8% | 3.5% | 1.3% | 3.6% | |
| --- | --- | --- | --- | --- | --- | --- | --- | --- | --- | --- | --- | --- | --- | --- | --- | --- | --- | --- | --- | --- | --- | --- | --- | --- | --- | --- | --- | --- | --- | --- | --- | --- | --- | --- | --- | --- | --- | --- | --- | --- | --- | --- | --- | --- | --- | --- | --- | --- | --- | --- | --- | --- | --- | --- | --- | --- | --- | --- | --- | --- | --- | --- | --- | --- | --- | --- | --- | --- | --- | --- | --- | --- | --- | --- | --- | --- | --- | --- | --- | --- | --- | --- | --- | --- | --- | --- | --- | --- | --- | --- | --- | --- | --- | --- | --- | --- | --- | --- | --- | --- | --- | --- | --- | --- | --- | --- | --- | --- | --- | --- | --- | --- | --- | --- | --- | --- | --- | --- | --- | --- | --- | --- | --- | --- | --- | --- | --- | --- | --- | --- | --- | --- | --- | --- | --- | --- | --- | --- | --- | --- | --- | --- | --- | --- | --- | --- | --- |
